# Supplementary material for: Manifestation of SARS-CoV-2 Infections in Mink Related to Host-, Virus- and Farm-Associated Factors, The Netherlands 2020
Source: MDPI journal article supplement (doi:10.3390/v14081754), 2022-08-11
Supplement: s1 [file s1]

## Supporting information

**Table S1.** List of the 19 scored clinical signs

| <b>General signs</b>                      | <b>Signs of the respiratory tract</b>       | <b>Signs of the gastrointestinal tract</b>       |
|-------------------------------------------|---------------------------------------------|--------------------------------------------------|
| Apathy                                    | <i>Upper respiratory tract</i>              | Diarrhea                                         |
| Fever                                     | Watery nasal discharge                      | Bleeding, inflammation or lesions of the gingiva |
| Weight loss                               | Hemorrhagic nasal discharge                 |                                                  |
| Reduced food intake / anorexia            | Watery eye effusion / excessive lacrimation |                                                  |
| Reduced water intake                      | Conjunctivitis                              |                                                  |
| Reduced fur quality / poor coat condition | Sinusitis                                   |                                                  |
| Increased mortality                       | Discoloration of the nose                   |                                                  |
|                                           | Crusts/lesions on the nose                  |                                                  |
|                                           | <i>Lower respiratory tract</i>              |                                                  |
|                                           | Breathing sounds (sneezing/coughing)        |                                                  |
|                                           | Tachypnea                                   |                                                  |
|                                           | Accessory breathing                         |                                                  |

**Table S2.** PCR test results for each individual farm including the number of swabs and the number and percentage of positive swabs for both rectal and throat swabs<sup>1,2</sup>

| <i>NB<sup>1</sup></i> | <i>Throat swabs</i> | <i>Throat swabs (+)</i> | <i>Throat swabs % (+)</i> | <i>Rectal swabs</i> | <i>Rectal swabs (+)</i> | <i>Rectal swabs % (+)</i> | <i>NB</i> | <i>Throat swabs</i> | <i>Throat swabs (+)</i> | <i>Throat swabs % (+)</i> | <i>Rectal swabs</i> | <i>Rectal swabs (+)</i> | <i>Rectal swabs % (+)</i> |
|-----------------------|---------------------|-------------------------|---------------------------|---------------------|-------------------------|---------------------------|-----------|---------------------|-------------------------|---------------------------|---------------------|-------------------------|---------------------------|
| NB1a                  | 5                   | 5                       | 100%                      | 5                   | 3                       | 60%                       | NB35      | 20                  | 12                      | 60%                       | 20                  | 19                      | 95%                       |
| NB1b                  | 9                   | 2                       | 22%                       | 20                  | 0                       | 0%                        | NB36*     | 20                  | 3                       | 15%                       | 20                  | 20                      | 100%                      |
| NB2                   | 5                   | 5                       | 100%                      | 5                   | 1                       | 20%                       | NB37      | 20                  | 20                      | 100%                      | 20                  | 1                       | 5%                        |
| NB3                   | 32                  | 14                      | 44%                       | 8                   | 4                       | 50%                       | NB38      | 20                  | 17                      | 85%                       | 20                  | 0                       | 0%                        |
| NB4                   | 4                   | 2                       | 50%                       | 4                   | 2                       | 50%                       | NB39      | 20                  | 19                      | 95%                       | 20                  | 2                       | 10%                       |
| NB5                   | 20                  | 2                       | 10%                       | 20                  | 0                       | 0%                        | NB40      | 22                  | 22                      | 100%                      | 22                  | 3                       | 14%                       |
| NB6                   | 20                  | 13                      | 65%                       | 20                  | 3                       | 15%                       | NB41      | 22                  | 19                      | 86%                       | 22                  | 2                       | 9%                        |
| NB7                   | 20                  | 8                       | 40%                       | 20                  | 3                       | 15%                       | NB42      | 20                  | 20                      | 100%                      | 20                  | 1                       | 5%                        |
| NB8                   | 21                  | 16                      | 76%                       | 21                  | 5                       | 24%                       | NB43      | 20                  | 20                      | 100%                      | 20                  | 4                       | 20%                       |
| NB9                   | 20                  | 1                       | 5%                        | 20                  | 2                       | 10%                       | NB44      | 20                  | 9                       | 45%                       | 20                  | 0                       | 0%                        |
| NB10                  | 20                  | 0                       | 0%                        | 20                  | 8                       | 40%                       | NB45*     | 20                  | 17                      | 85%                       | 20                  | 1                       | 5%                        |
| NB11                  | 20                  | 13                      | 65%                       | 20                  | 1                       | 5%                        | NB46      | 20                  | 16                      | 80%                       | 20                  | 0                       | 0%                        |
| NB12                  | 21                  | 19                      | 90%                       | 21                  | 4                       | 19%                       | NB47      | 20                  | 20                      | 100%                      | 20                  | 0                       | 0%                        |
| NB13                  | 21                  | 7                       | 33%                       | 20                  | 0                       | 0%                        | NB48      | 20                  | 20                      | 100%                      | 20                  | 0                       | 0%                        |
| NB14                  | 20                  | 7                       | 35%                       | 20                  | 2                       | 10%                       | NB49*     | 40                  | 20                      | 100%                      | 40                  | 0                       | 0%                        |
| NB15                  | 20                  | 17                      | 85%                       | 20                  | 4                       | 20%                       | NB50*     | 20                  | 17                      | 85%                       | 20                  | 6                       | 30%                       |
| NB16                  | 20                  | 8                       | 40%                       | 20                  | 2                       | 10%                       | NB51      | 20                  | 20                      | 100%                      | 20                  | 1                       | 5%                        |
| NB17*                 | 20                  | 18                      | 90%                       | 20                  | 4                       | 20%                       | NB52*     | 20                  | 19                      | 95%                       | 20                  | 0                       | 0%                        |
| NB18                  | 21                  | 8                       | 38%                       | 20                  | 3                       | 15%                       | NB53*     | 20                  | 20                      | 100%                      | 20                  | 0                       | 0%                        |
| NB19                  | 20                  | 16                      | 80%                       | 20                  | 0                       | 0%                        | NB54*     | 21                  | 21                      | 100%                      | 21                  | 6                       | 29%                       |
| NB20                  | 41                  | 6                       | 15%                       | 41                  | 0                       | 0%                        | NB55      | 20                  | 20                      | 100%                      | 20                  | 0                       | 0%                        |
| NB21                  | 20                  | 14                      | 70%                       | 20                  | 2                       | 10%                       | NB56*     | 22                  | 19                      | 86%                       | 22                  | 14                      | 64%                       |
| NB22                  | 20                  | 1                       | 5%                        | 20                  | 0                       | 0%                        | NB57      | 20                  | 20                      | 100%                      | 20                  | 6                       | 30%                       |
| NB23                  | 20                  | 7                       | 35%                       | 20                  | 2                       | 10%                       | NB58      | 20                  | 18                      | 90%                       | 20                  | 3                       | 15%                       |
| NB24                  | 20                  | 1                       | 5%                        | 20                  | 0                       | 0%                        | NB59      | 20                  | 20                      | 100%                      | 20                  | 4                       | 20%                       |
| NB25                  | 21                  | 4                       | 19%                       | 21                  | 0                       | 0%                        | NB60      | 20                  | 16                      | 80%                       | 20                  | 9                       | 45%                       |
| NB26*                 | 20                  | 20                      | 100%                      | 20                  | 14                      | 70%                       | NB61*     | 24                  | 23                      | 96%                       | 23                  | 14                      | 61%                       |
| NB27                  | 20                  | 18                      | 90%                       | 20                  | 3                       | 15%                       | NB62*     | 20                  | 19                      | 95%                       | 20                  | 9                       | 45%                       |
| NB28                  | 20                  | 20                      | 100%                      | 20                  | 8                       | 40%                       | NB63      | 20                  | 20                      | 100%                      | 20                  | 12                      | 60%                       |
| NB29                  | 20                  | 20                      | 100%                      | 20                  | 1                       | 5%                        | NB64*     | 20                  | 20                      | 100%                      | 20                  | 0                       | 0%                        |
| NB30*                 | 22                  | 1                       | 5%                        | 22                  | 1                       | 5%                        | NB65      | 20                  | 20                      | 100%                      | 20                  | 0                       | 100%                      |
| NB31                  | 20                  | 20                      | 100%                      | 20                  | 8                       | 40%                       | NB66      | 20                  | 0                       | 0%                        | 20                  | 0                       | 0%                        |
| NB32                  | 20                  | 20                      | 100%                      | 20                  | 0                       | 0%                        | NB67      | 20                  | 20                      | 100%                      | 20                  | 2                       | 10%                       |
| NB33*                 | 20                  | 20                      | 100%                      | 20                  | 6                       | 30%                       | NB68      | 20                  | 20                      | 100%                      | 20                  | 3                       | 15%                       |
| NB34                  | 20                  | 19                      | 95%                       | 20                  | 3                       | 15%                       |           |                     |                         |                           |                     |                         |                           |

<sup>1</sup> The farms which were officially sampled multiple times are marked with an asterisk; <sup>2</sup> The farms NB5-NB26 were diagnosed in the months before August. The farms NB27-NB68 were diagnosed from 1 August onwards.

**Table S3.** The proportion of kits and females with clinical signs.

|                   | <b>Kits</b> | <b>Females</b> |
|-------------------|-------------|----------------|
| Clinical signs    | 0.64        | 0.75           |
| No clinical signs | 0.36        | 0.25           |

**Table S4.** Proportion of farms with positive PCR test results for throat and rectal swabs grouped in prevalence classes for farms diagnosed before August and from August onwards.

| <b>Type of swab<sup>1</sup></b> | <b>Prevalence class<sup>2</sup></b> |        |      |
|---------------------------------|-------------------------------------|--------|------|
| Throat swabs                    | < 25%                               | 25-75% | >75% |
| < August                        | 0.30                                | 0.40   | 0.30 |
| ≥ August                        | 0.07                                | 0.05   | 0.88 |
| Rectal Swabs                    | < 25%                               | 25-75% | >75% |
| < August                        | 0.81                                | 0.19   | 0.00 |
| ≥ August                        | 0.67                                | 0.26   | 0.07 |

<sup>1</sup> An average of 20 throat and 20 rectal swabs were taken at each farm from minks with clinical signs or from mink in cages with prior observed mortality if present, and otherwise randomly; <sup>2</sup> The specificity of the PCR test is presumed 100% based on Corman et al., 2020<sup>#</sup>.

<sup>#</sup> Corman, V.M.; Landt, O.; Kaiser, M.; Molenkamp, R.; Meijer, A.; Chu, D.K.; Bleicker, T.; Brünink, S.; Schneider, J.; Schmidt, M.L.; Mulders, D.G.; Haagmans, B.L.; van der Veer, B.; van den Brink, S.; Wijsman, L.; Goderski, G.; Romette, J.; Ellis, J.; Zambon, M.; Peiris, M.; Goossens, H.; Reusken, C.; Koopmans, M.P.; Drosten, C. Detection of 2019 novel coronavirus (2019-nCoV) by real-time RT-PCR. Euro Surveill 2020, 25, DOI 10.2807/1560-7917.ES.2020.25.3.2000045. Available online: <https://www.ncbi.nlm.nih.gov/pmc/articles/PMC6988269/> (accessed on Jun 24, 2022).

**Table S5.** Overview of the dataset of the extensively sampled mink farms

| NB  | Analyzed samples<br>N = | Sex<br>N = ... <sup>1</sup> | Age<br>N = ... <sup>2</sup> | Color<br>N = ... <sup>3</sup>                                                                                            | Positive serology<br>N = | PCR pool N= | PCR Indiv N= | Positive PCR | Animals with<br>Signs N = | Type of Signs<br>N =                                     | Type of housing |
|-----|-------------------------|-----------------------------|-----------------------------|--------------------------------------------------------------------------------------------------------------------------|--------------------------|-------------|--------------|--------------|---------------------------|----------------------------------------------------------|-----------------|
| All | 1523                    | T = 388<br>R = 1015         | J = 908<br>O = 495          | Jag = 11<br>Pearl = 87<br>SBL = 422<br>SCR = 45<br>Wild = 633<br>Brown = 16<br>Mahogany = 100<br>Black = 88<br>Other = 1 | 55                       | 780         | 504          |              | 144                       |                                                          |                 |
| 46  | 130                     | T = 90*<br>R = 40           | J = 40<br>O = 90*           | SBL = 64*<br>Wild = 66                                                                                                   | 1                        | 36          | 0            | 100%         | 1                         | Unknown                                                  | Hall            |
| 48  | 155                     | T = 81*<br>R = 74*          | J = 91*<br>O = 64*          | Jag = 9*<br>Pearl = 16<br>SBL = 76*<br>SCR = 28*<br>Wild = 26*                                                           | 0                        | 34          | 0            | 100%         | 10                        | Unknown                                                  | Hall            |
| 50  | 112                     | T = 96*<br>R = 16           | J = 79<br>O = 21*<br>G = 12 | SBL = 18<br>SCR = 5<br>Wild = 89*                                                                                        | 9                        | 18          | 25           | 100%         | 3                         | Unknown                                                  | Sheds           |
| 52  | 232                     | T = 195*<br>R = 37*         | J = 140*<br>O = 92*         | Brown = 16<br>FY = 1<br>Jag = 2<br>Pearl = 71<br>SBL = 28<br>SCR = 4<br>Wild = 22*<br>Black = 88*                        | 2                        | 19          | 141          | 100%         | 4                         | General (3)<br>Respiratory (1)                           | Halls<br>Sheds  |
| 53  | 314                     | T = 250*<br>R = 64*         | J = 107*<br>O = 207*        | MAH = 73*<br>SBL = 78*<br>Wild = 163*                                                                                    | 39                       | 39          | 148          | 100%         | 55                        | General (6)<br>Respiratory (50)<br>Gastro-intestinal (1) | Sheds           |
| 54  | 267                     | T = 187*<br>R = 80*         | J = 207*<br>O = 60*         | MAH = 27<br>SBL = 113*<br>SCR = 4<br>Wild = 123*                                                                         | 1                        | 39          | 110          | 100%         | 22                        | General (5)<br>Respiratory (16)                          | Sheds           |
| 61  | 193                     | T = 116*<br>R = 77*         | J = 143*<br>O = 50*         | SBL = 45*<br>SCR = 4*<br>Wild = 144*                                                                                     | 3                        | 0           | 40           | 100%         | 17                        | General (2)<br>Respiratory (13)<br>Gastro-intestinal (1) | Hall            |

<sup>1</sup> T = female, R = male; <sup>2</sup> J = young (< 1 year), O = adult (1 > year), G = gusted; <sup>3</sup> SBL = silver blue, Jag = jaguar, SCR = silver cross, MAH = mahogany; \* Presence of clinical signs is indicated with an asterisk.

**Table S6.** Mean Ct-values for the RT-PCR of positive samples on the seven extensively sampled farms, with for the mink-related variables with a significant associations with Ct-value, i.e. sex/age, the hazard ratio and 95% confidence interval (95% CI) based on survival analysis.

| <b>Independent Variable</b> | <b>Categories</b> | <b>N<sup>1</sup></b> | <b>Mean</b> | <b>HR<sup>2</sup></b> | <b>95% CI<sup>2</sup></b> |
|-----------------------------|-------------------|----------------------|-------------|-----------------------|---------------------------|
| Sex/age <sup>3</sup>        | Juvenile males    | 388                  | 21.26       | Ref <sup>2</sup>      |                           |
|                             | Juvenile females  | 521                  | 22.36       | 0.75                  | 0.60-0.95*                |
|                             | Adult females     | 494                  | 22.34       | 0.77                  | 0.59-0.99*                |

<sup>1</sup>Total number of mink for the given variables; <sup>2</sup> HR = Hazard ratio (exponentiated coefficients (exp(coef)) and lower and upper values for the 95% confidence interval (CI) around the HR for the given variables. Ref is the category used as reference. <sup>3</sup> Juveniles are <1 year, adults >1 year or age; \* Significant associations based on the 95% CI are indicated with an asterisk.
